# Supplementary material for: Carbon coated heterojunction CoSe2/Sb2Se3 nanospheres for high-efficiency sodium storage
Source: Royal Society of Chemistry journal article supplement (doi:10.1039/d3dt00101f), 2023-01-01
Supplement: d3dt00101f1.pdf [file d3dt00101f1.pdf]

Supplementary Information

## **Carbon coated heterojunction CoSe<sub>2</sub>/Sb<sub>2</sub>Se<sub>3</sub> nanospheres for high-efficiency sodium storage**

**Gongqiang Li,<sup>a</sup> Meng Song,<sup>a</sup> Xiao Zhang,<sup>a,\*</sup> Yanfang Sun,<sup>b,\*</sup> Jinxue Guo<sup>a,\*</sup>**

*<sup>a</sup>Key Laboratory of Optic-electric Sensing and Analytical Chemistry for Life Science, MOE, Key Laboratory of Biochemical Analysis, Shandong Province, College of Chemistry and Molecular Engineering, Qingdao University of Science & Technology, Qingdao 266042, PR China*

*<sup>b</sup>College of Science and Technology, Hebei Agricultural University, Cangzhou 061100, China*

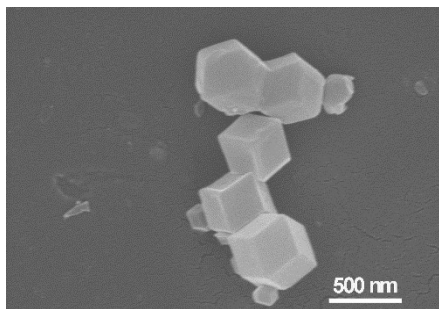

**Fig. S1** SEM of ZIF-67 precursor.

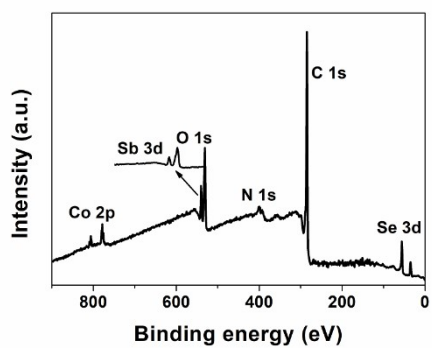

**Fig. S2** XPS survey spectrum of CoSe<sub>2</sub>/Sb<sub>2</sub>Se<sub>3</sub>@C.

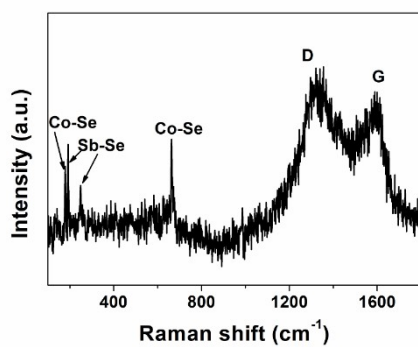

**Fig. S3** Raman spectrum of CoSe<sub>2</sub>/Sb<sub>2</sub>Se<sub>3</sub>@C.

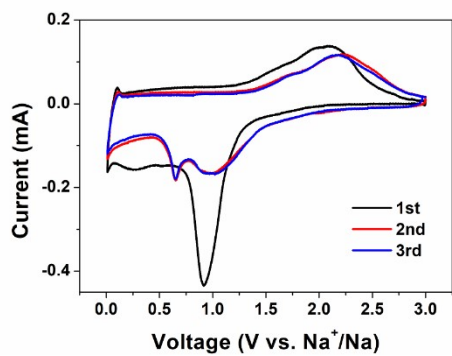

**Fig. S4** The initial three CV curves of CoSe<sub>2</sub>@C at a scan rate of 0.1 mV s<sup>-1</sup>.

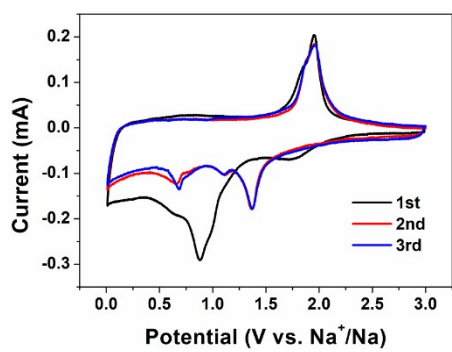

**Fig. S5** The initial three CV curves of CoSe<sub>2</sub>/Sb<sub>2</sub>Se<sub>3</sub> at a scan rate of 0.1 mV s<sup>-1</sup>.

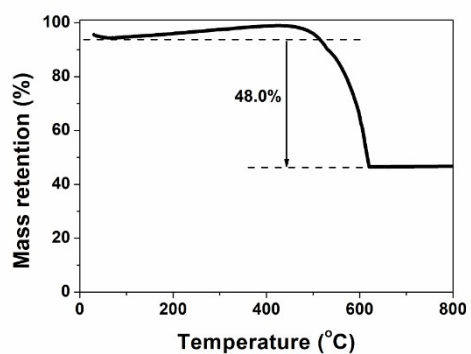

**Fig. S6** TGA curve of CoSe<sub>2</sub>/Sb<sub>2</sub>Se<sub>3</sub>@C.

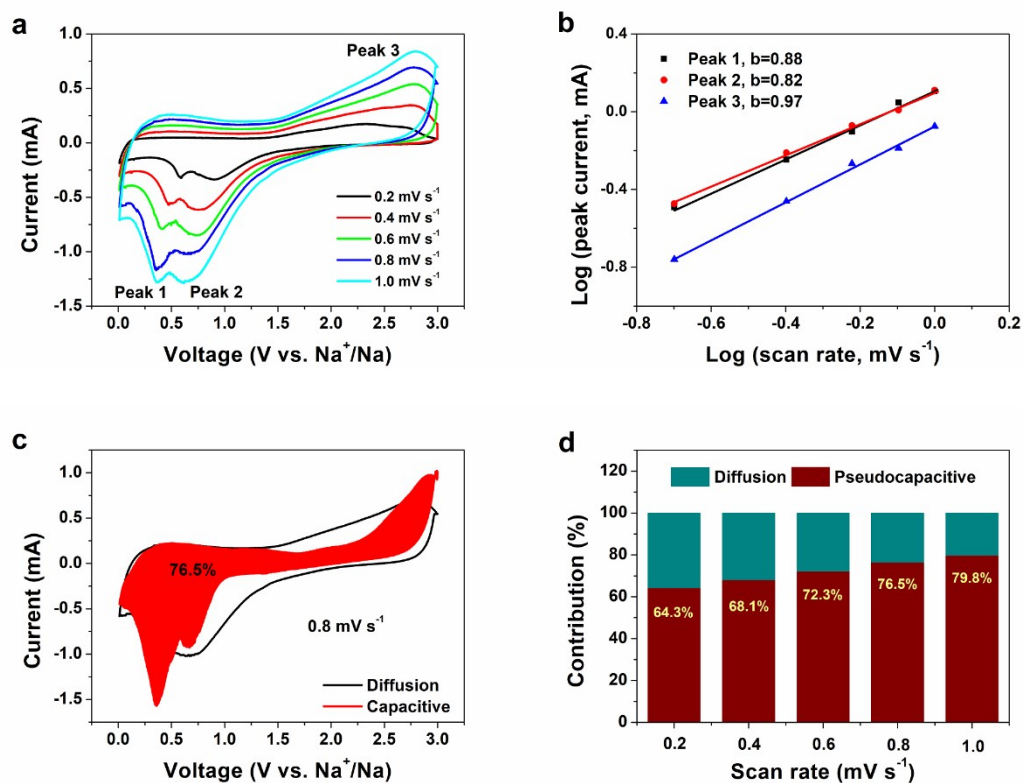

**Fig. S7** Determination of pseudocapacitance contribution of CoSe<sub>2</sub>@C. (a) CV curves at different sweep rates and (b) the corresponding log (peak current) versus log (scan rate) lines. (c) The separated regions of capacitive contribution (in red) and diffusion-controlled contribution (in white) at 1 mV s<sup>-1</sup>. (d) Capacitive contribution ratio at various sweep rates.

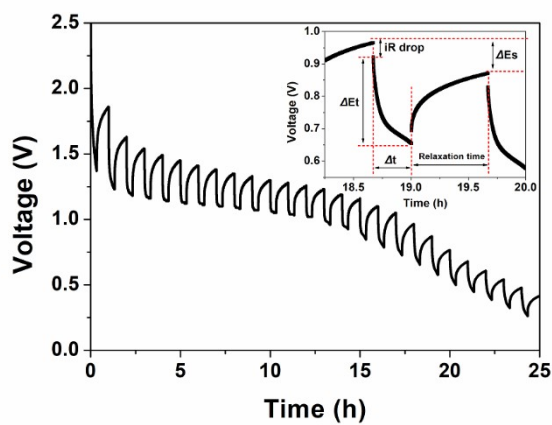

**Fig. S8** GITT curves of CoSe<sub>2</sub>@C (inset: voltage versus time curve for a GITT curve).
